# Supplementary material for: Influence of enhanced Asian NO x emissions on ozone in the Upper Troposphere and Lower Stratosphere (UTLS) in chemistry climate model simulations
Source: Copernicus journal article supplement (doi:10.5194/acp-2016-582), 2016-07-20
Supplement: Supplementary file 1 [file acp-2016-582-supplement.pdf]

# Supplementary Figures

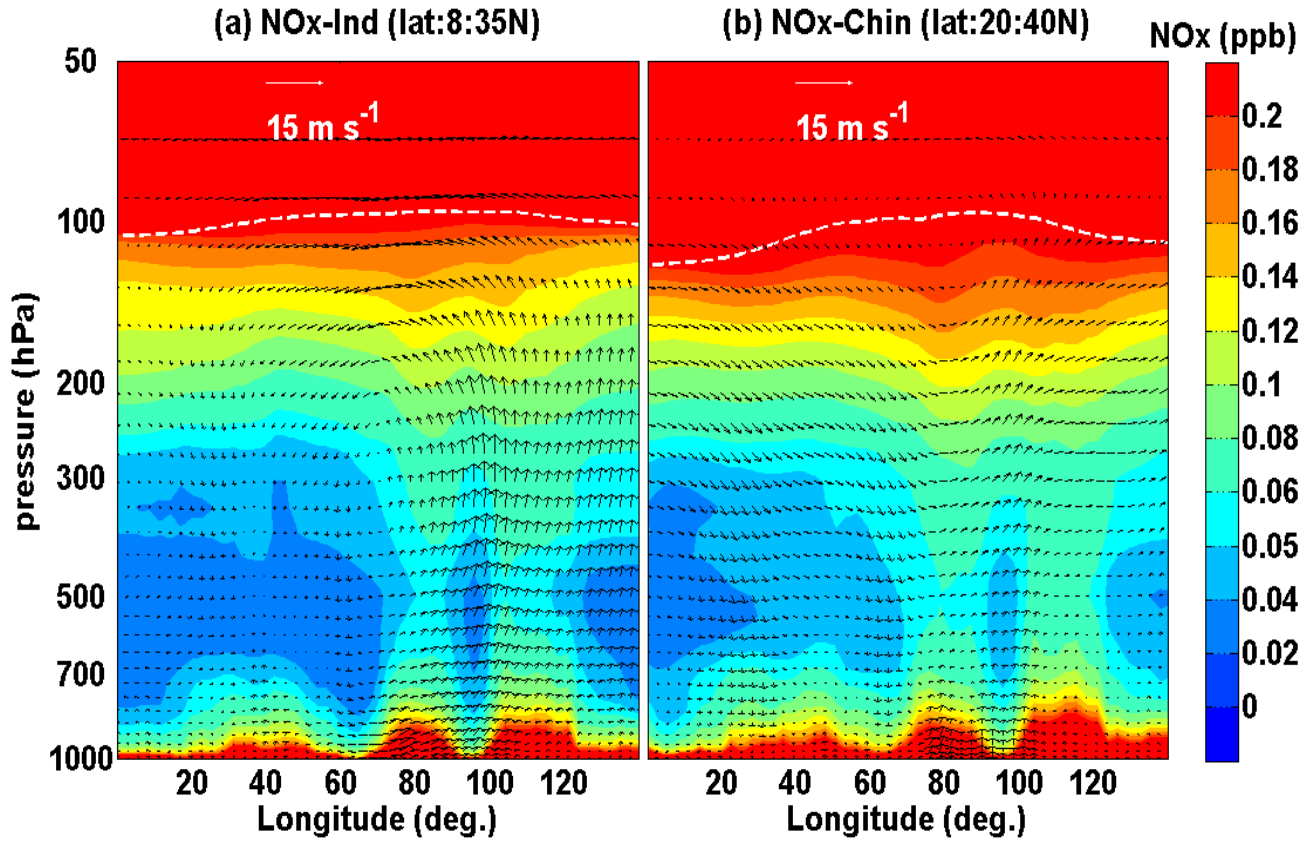

Figure S1: Vertical distribution of NO<sub>x</sub> (ppb) averaged for the monsoon season (June-September) over the (a) Indian latitudes (8°-35°N) and (b) Chinese latitudes (20°-40°N) as obtained from CTRL simulations. The vertical velocity field has been scaled by 300. The dashed line represents the tropopause.

23  
24  
25  
26  
27  
28  
29  
30  
31  
32  
33  
34  
35  
36  
37  
38  
39  
40  
41  
42  
43  
44  
45  
46  
47

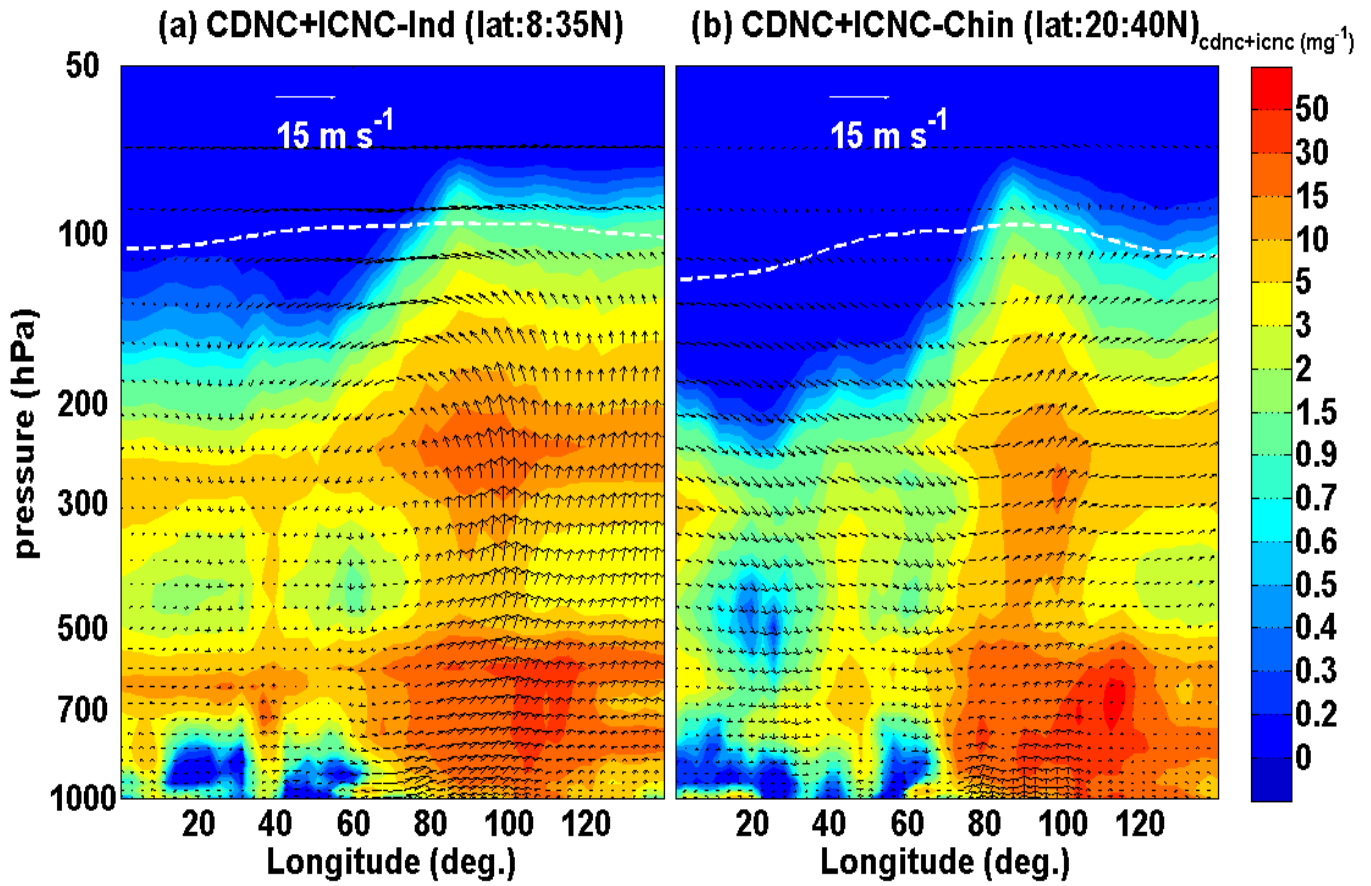

48 Figure S2: Distribution of cloud droplet number concentration (CDNC) and ice crystal number  
49 concentration (ICNC) together ( $\text{mg}^{-1}$ ) averaged for the monsoon season (June-September) over the (a)  
50 Indian latitudes (8°-35°N) and (b) Chinese latitudes (20°-40°N) as obtained from CTRL simulations.  
51 The vertical velocity field has been scaled by 300. The dashed line represents the tropopause.
